# Supplementary material for: A Prader–Willi locus lncRNA cloud modulates diurnal genes and energy expenditure
Source: PubMed Central journal article supplement (PMC3792690; doi:10.1093/hmg/ddt281), 2013-06-13
Supplement: supp_ddt281_ddt281supp.pdf [file supp_ddt281_ddt281supp.pdf]

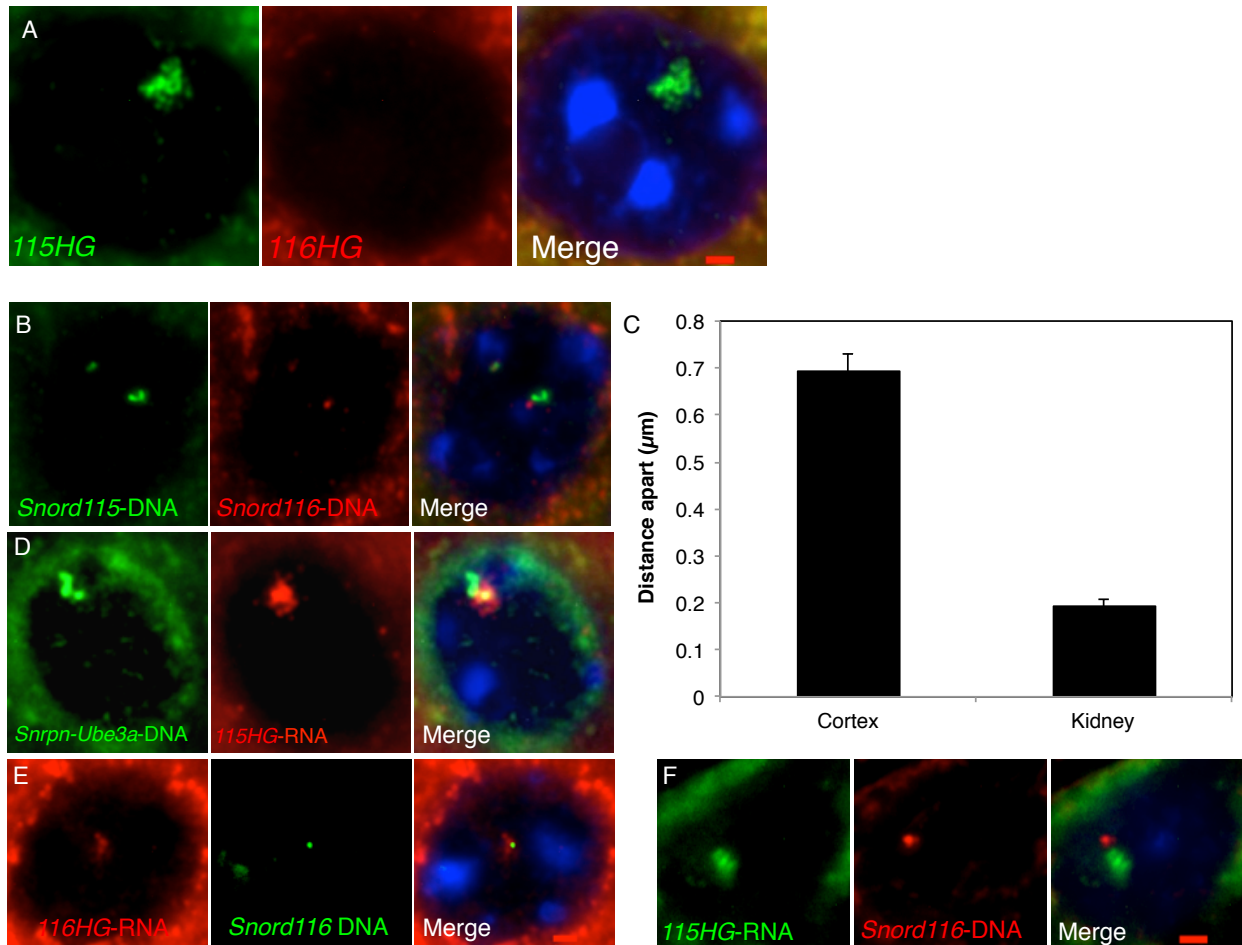

**Supplementary Figure S1, related to Figure 2.** *116HG* is not present in *Snord116del* (+/-) mice and localizes to the site of its transcription in neuronal nuclei. (A) RNA FISH was performed using spliced host gene probes specific for *115HG* (green) and *116HG* (red) on adult wild-type mouse cortex. (B) DNA FISH was performed using nick translated BAC probes for *Snord116* (red) and *Snord115* (green) repeat regions on adult wild-type mouse cortex. The decondensed paternal allele in neuronal nuclei shows a separation between the adjacent *116HG* and *115HG* loci. (C) Distance between *Snord116* and *Snord115* DNA FISH signals was measured in adult wild-type mouse cortex and kidney nuclei (n=137), showing that chromatin decondensation and separation of the adjacent loci is tissue specific. (D) Combined DNA and RNA FISH to adult mouse cortical tissue revealed partial colocalization of the *115HG* lncRNA

(red) with the encoding locus on the paternal decondensed allele of *Snrpn* through *Ube3a* (green). (E) The *Snord116* DNA FISH probe colocalized with *116HG*. (F) *Snord116* DNA did not colocalize with *115HG*. Nuclei were counterstained with DAPI (blue) and scale bar is 1  $\mu\text{m}$ .

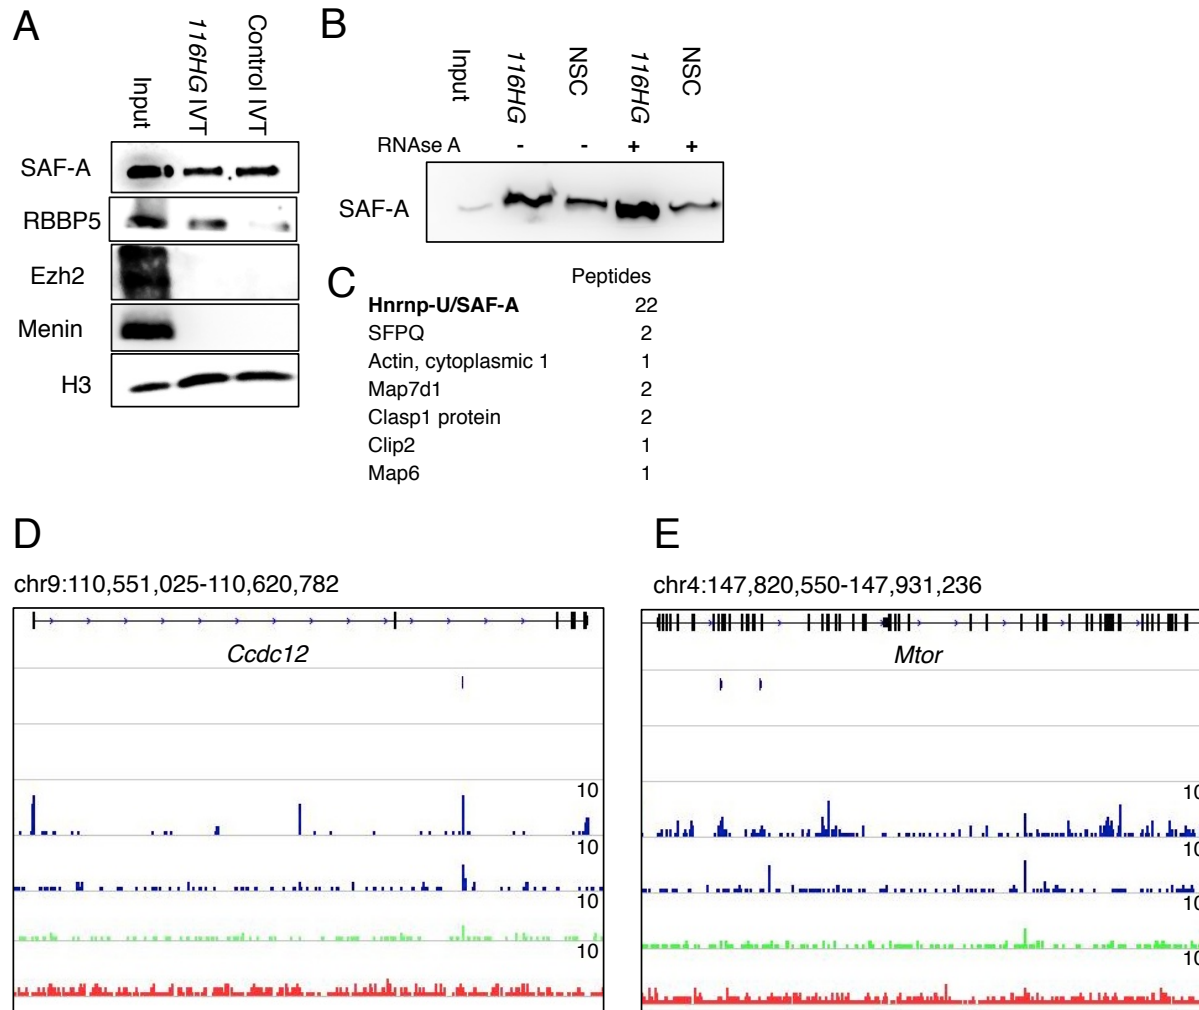

**Supplementary Figure S2, related to Figure 2 and Figure 3.** SAF-A was identified by mass spectrometry of *116HG* ChIRP, but association was not specific and not RNA dependent, unlike RBBP5. *116HG* is bound to regions genome-wide. **(A)** Pull-down of *in vitro* biotinylated *116HG* retrieved RBBP5, but not Ezh2 or Menin. SAF-A was retrieved by both biotinylated *116HG* and by a biotinylated control IVT RNA. **(B)** ChIRP with *116HG* or non-specific control (NSC) oligos retrieved SAF-A, but the interaction was not reduced with RNase treatment. **(C)** Mass spectrometry identification of ChIRP-retrieved proteins revealed SAF-A/HNRNP-U as the dominant protein, with 22 peptides. **(D)** and **(E)** Black represents annotated genes. Blue represents peaks of *116HG* ChIRP from WT brain, and read coverage from two independent

ChIRP experiments. Green represents peaks from merge of 3 control ChIRP experiments (*116HG* ChIRP on *Snord116del<sup>+/-</sup>* brain, NSC ChIRP on WT and *Snord116del<sup>+/-</sup>* brain) and read coverage from NSC ChIRP on WT brain. Red represents read coverage from WT input. Scale is 0-10 reads.

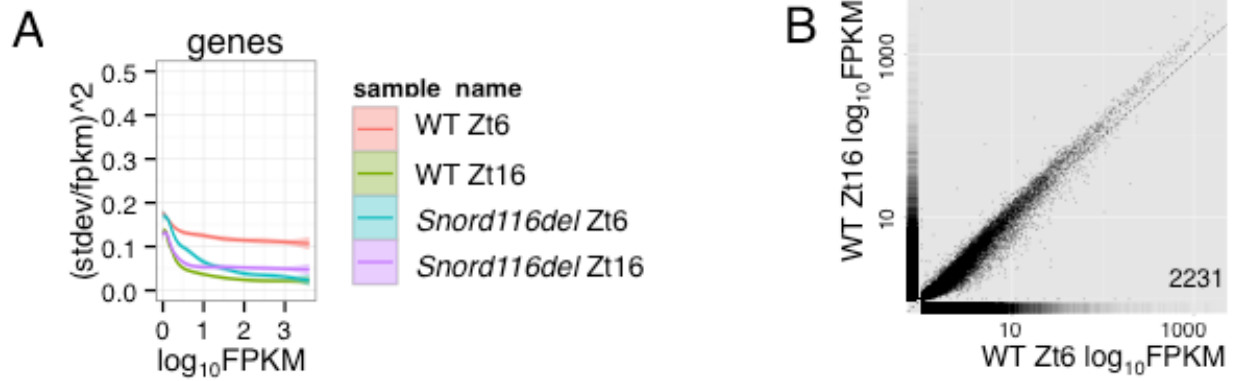

**Supplementary Figure S3, related to Figure 5.** RNA-seq reveals time-of-day dependent genotype effects on transcript levels (A) CummeRbund generated plot of squared coefficient of variation of all samples used in RNA-seq analysis. (B) Comparison of expression in WT mice by RNA-seq shows 2,231 genes changed with time of day.

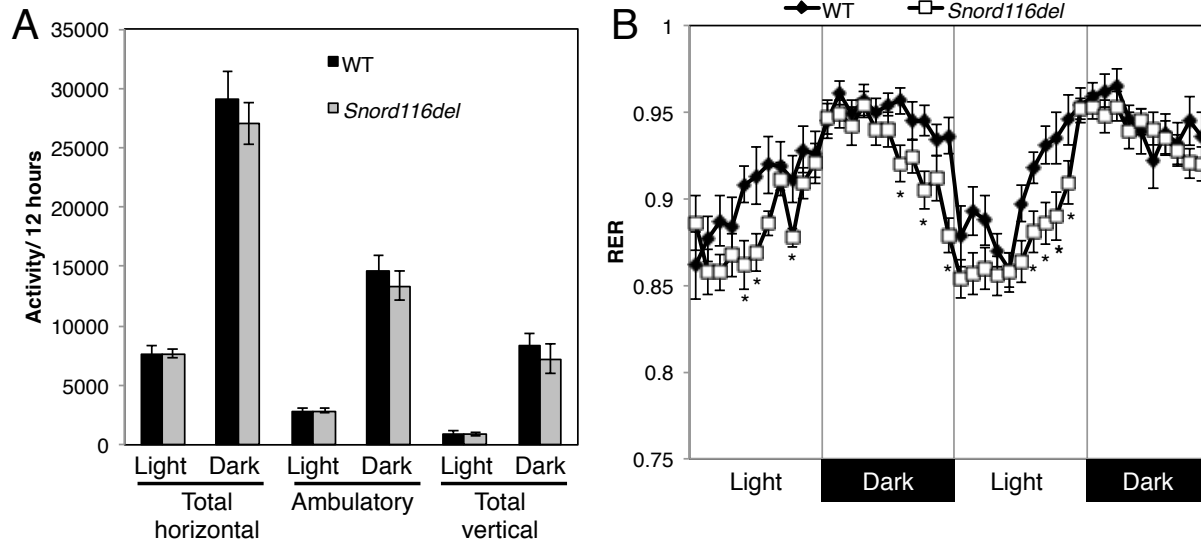

**Supplementary Figure S4, related to Figure 6.** *Snord116del*<sup>+/-</sup> are smaller with less fat mass and have normal rhythms of food intake and activity. **(A)** *Snord116del*<sup>+/-</sup> mice do not differ from WT littermates in total horizontal, ambulatory, or total vertical activity. **(B)** *Snord116del*<sup>+/-</sup> mice exhibit lower RER during light hours as compared to WT mice, but do have diurnal cycling of RER.

**Supplementary Tables 1-7 as separate excel file.**
